# Supplementary material
Source: PubMed Central journal article supplement (PMC3934168)
Supplement: JCI73434sd.pdf [file JCI73434sd.pdf]

**Supplemental Figure 1: Dclk1-Cre & Dclk1-Cre<sup>TM</sup> label long-lived epithelial tuft cells**

**A)** Cloning strategy of Dclk1-CreGFP and Dclk1-CreERT mice and depiction of Cre-mediated recombination in Dclk1-CreERT mice following induction with Tamoxifen. **B)** LacZ staining of stomach tissue from Dclk1 R26LacZ mice at various time points post induction with Tamoxifen. **C&D)** Representative fluorescent photographs of small intestinal (C) and colonic (D) sections from 12 months old Dclk1-CreERT R26mTomatoGFP mice without administration of Tamoxifen. No recombination (as indicated by absence of membranous GFP) can be seen. **E&F)** Representative FACS plot of intestinal (E) and colonic (F) cell preparations from Dclk1 R26tdTom mice. Cells were gated based on red-fluorescence (Dclk1) and CD326 (EpCam) expression.

**Supplemental Figure 2: Dclk1-Cre & Dclk1-Cre<sup>TM</sup> labeled cells express tuft cell markers**

**A-C)** Immunofluorescence for epithelial tuft cell markers (Dclk1, alpha-gustducin & acetylated tubulin) in the intestine (A), colon (B) and stomach (C) of Dclk1-CreGFP mice. **D)** Cox2 staining (red) on Dclk1 R26TGFP mice. **E)** Quantification of overlap between Cox2 and Dclk1 recombined cells in the small intestine of Dclk1 R26tdTom mice.

**Supplemental Figure 3: Small intestinal Dclk1<sup>+</sup> require neural input for survival**

**A)** Small intestinal organoids from Dclk1 R26tdTom mice cultured in the presence of GFP positive neurons 5 days (left panel) and 10 days (right panel) after isolation. **B)** Quantification of Dclk1 cells in intestinal organoids in the presence and absence of neurons 10 days post isolation. **C-F)** Intestinal organoids derived from Dclk1 R26DTA mice cultured in the presence (D&F) and absence of neurons (C&E). 4OH-Tamoxifen was added to induce expression of DTA in Dclk1<sup>+</sup> cells (C&E). **G)** Quantification of intestinal organoids in the presence and absence of neurons (left panel) and after Dclk1 cell ablation (right panel).

**Supplemental Figure 4. Dclk1<sup>+</sup> cells require proper innervation for survival**

**A)** Immunohistochemistry of PGP 9.5 (left) and Dclk1 (right) on biopsy samples from intestinal transplant patients. Upper panels show samples from native, lower panels from graft intestine. **B)** Quantification of Dclk1 positive cells in biopsy samples (n=2) depicted

in A). **C**) Immunofluorescence for peripherin (green) on wildtype (left) and  $RET^{-/-}$  mice (right) **D**) Immunofluorescence for Cox2 (red) on wildtype (left) and  $RET^{-/-}$  mice (right). **E**) Quantification of intestinal tuft cells in wildtype and  $RET^{-/-}$  mice.

#### **Supplemental Figure 5: Gastric Dclk1+ cells require neural input for survival**

**A-D**) Gastric organoids derived from Dclk1 R26tdTom mice cultured in the absence (A&C) and presence of neurons after 3 (A&B) and 14 (C&D) days in culture. Dclk1+ cells express tdTomato (red) neurons express GFP (green). **E**) Immunohistochemistry for Dclk1 on paraffin embedded gastric organoids in the absence (control) and presence of neurons (+nerve). Arrowheads mark Dclk1 positive cells. **F**) Quantification of Dclk1+ cells in gastric organoids in the presence of absence of neurons. **G&H**) Representative photographs of intestinal organoids derived from Dclk1-CreERT x R26tdTomato mice cultured in the presence (H) and absence of 100 $\mu$ M Pilocarpine (G). **I**) Quantification of Dclk1+ cells in (G) and (H).

#### **Supplemental Figure 6: Dclk1 cells expand in response to chronic inflammation and in preneoplastic states**

**A**) Immunohistochemistry for Dclk1 on the corpus of HKATPase-IL1 $\beta$  mice infected with *H. felis*. **B**) Immunohistochemistry for Dclk1 Barrett's lesions in P2-IL1 $\beta$  mice. **C&D**) Immunofluorescence for Dclk1 on intestinal sections from B6 mice infected with *H. hepaticus* (D) and controls (C). **E**) Quantification of Dclk1+ cells in mice infected with *H. hepaticus* and controls. **F&G**) Immunohistochemistry for Dclk1 on colonic sections from mice infected with *B. fragilis* (G) and controls (F). **H**) Quantification of Dclk1+ cells in (F&G) (Scale bars: 50  $\mu$ m).

#### **Supplemental Figure 7: Pathology of murine models of colonic neoplasia**

**A**) Early colonic polyps in APC<sup>min</sup> mice. Proliferation with evidence of surface maturation is seen. An early sessile proliferative lesion is characterized by increase in proliferative zone of polyp in (A). Right panel: Typical early polypoid proliferative lesion. **B**) H&E of colonic lesions in Lgr5-CreERT x APC<sup>flox/flox</sup> mice: Numerous colonic adenomas are present. Left panel: Numerous small adenomas with low grade dysplasia arising in the background of colonic mucosa with multifocal low grade dysplasia Right panel: Higher power magnification shows minute adenoma composed of two dysplastic crypts.

**C)** H&E of colonic lesions in Dclk1-CreERT x APC<sup>fl<sup>ox</sup>/fl<sup>ox</sup></sup>: Few adenomas are present with features of invasive carcinoma and complex architectural patterns of growth and associated desmoplastic stroma. Left panel: A large advanced polyp with marked architectural complexity arising in the background of normal mucosa Right panel: Higher power magnification shows complex cribriform structures associated with focal tumor cell necrosis. The surrounding fibroblastic tissue reaction characterizing desmoplasia surrounding the neoplastic epithelium is a feature of invasive carcinoma (Original magnifications 40x, 200x)

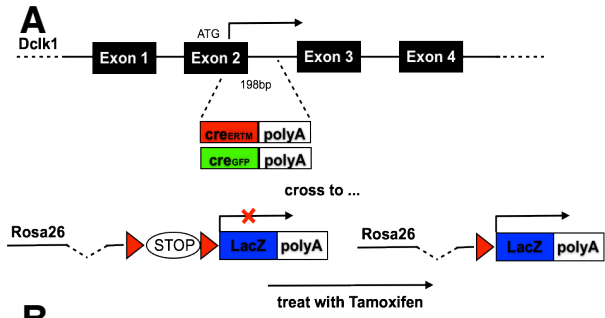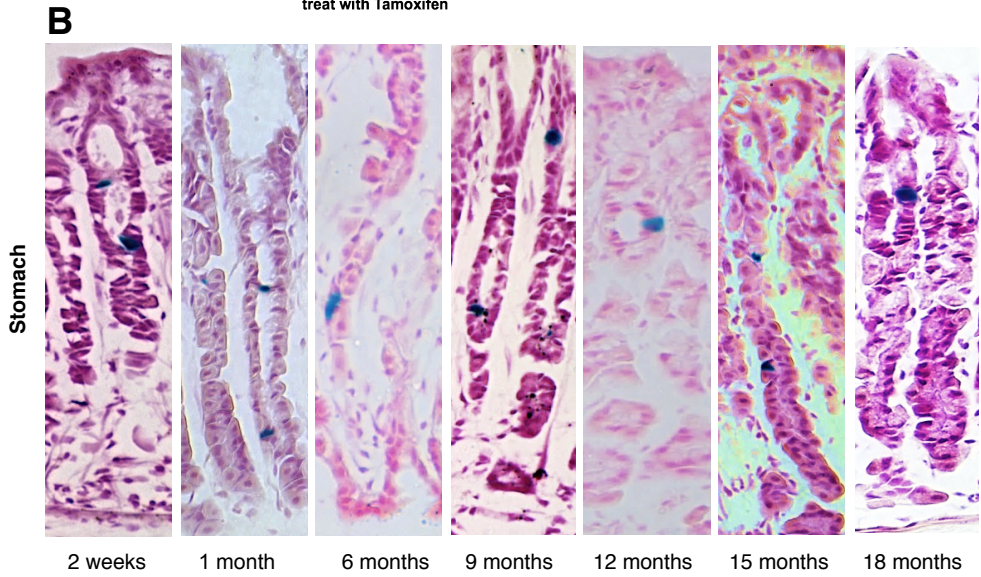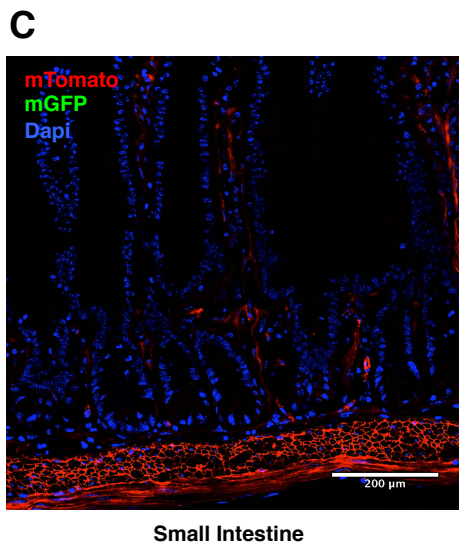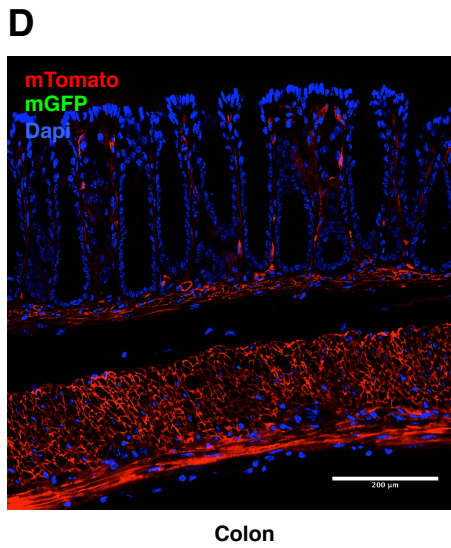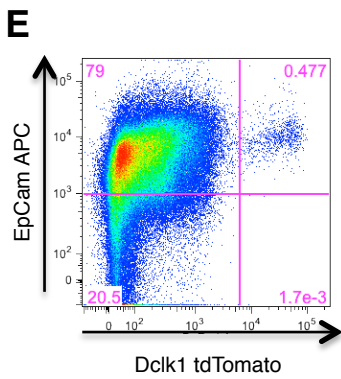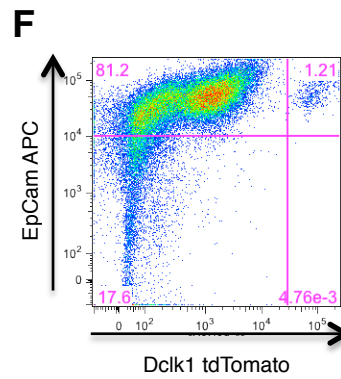

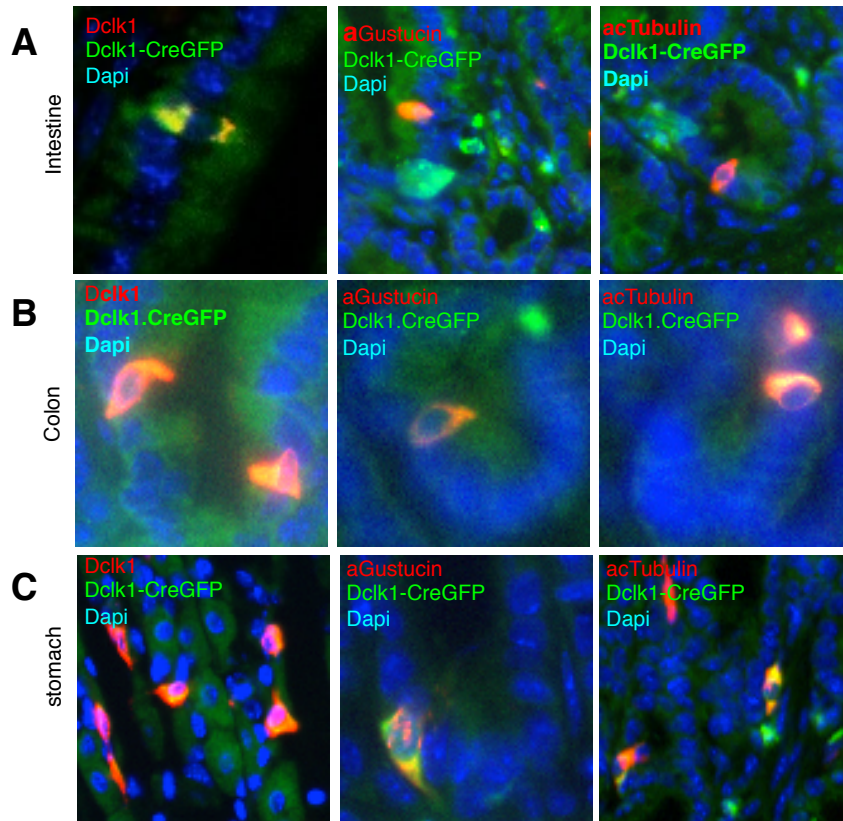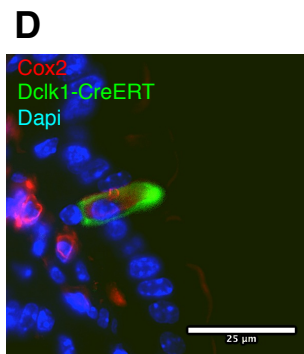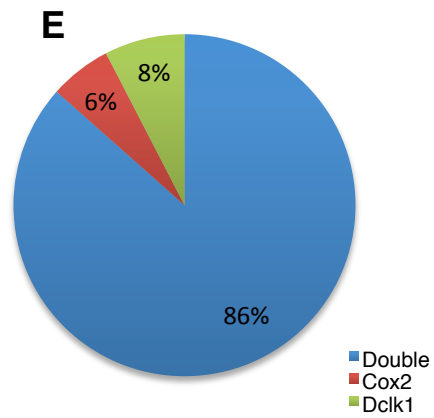

**A**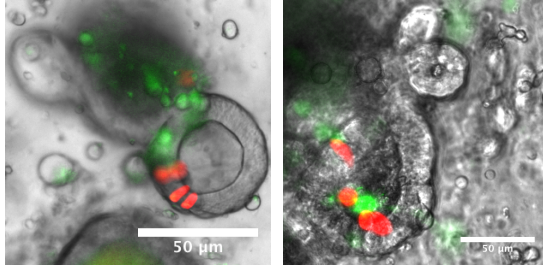**B**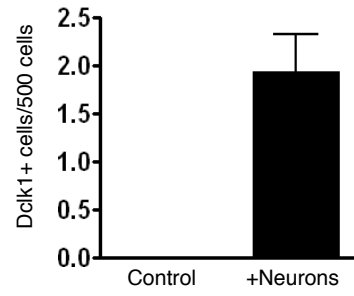

Dclk1 CreERT x R26DTA

**C**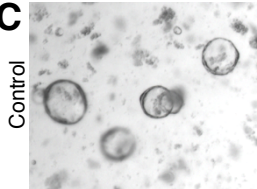

Control

**D**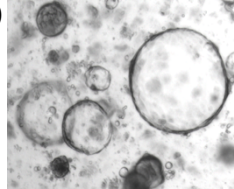

+ Nerve

**E**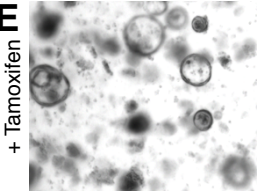

+ Tamoxifen

Control

**F**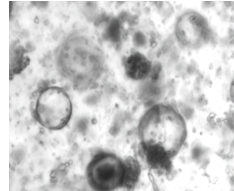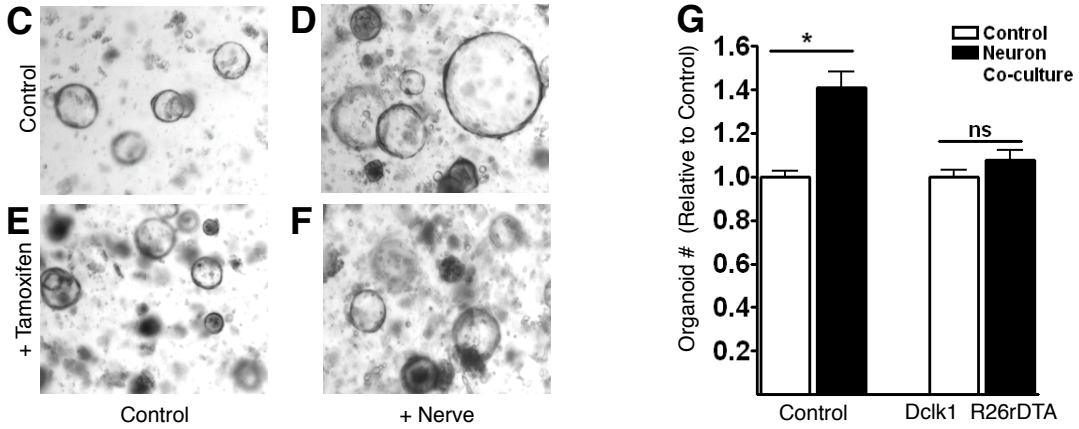

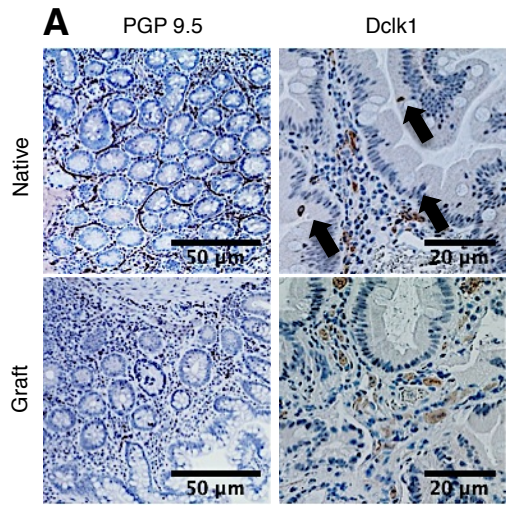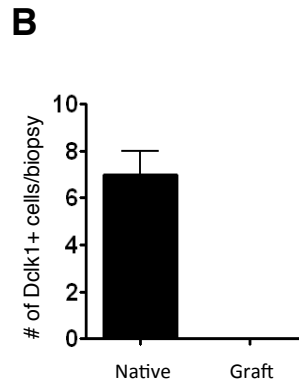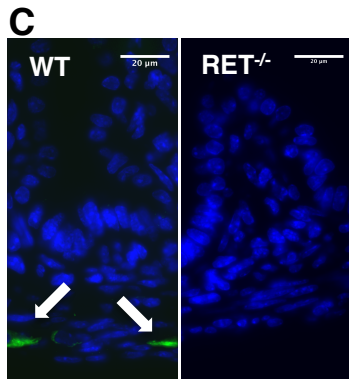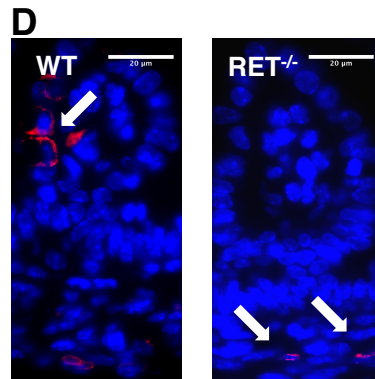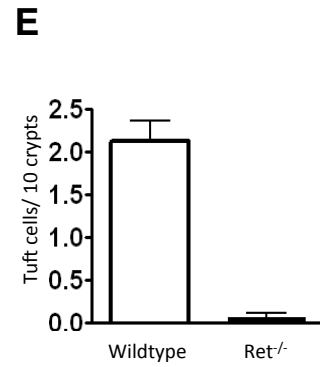

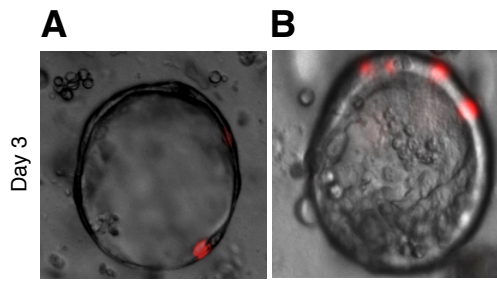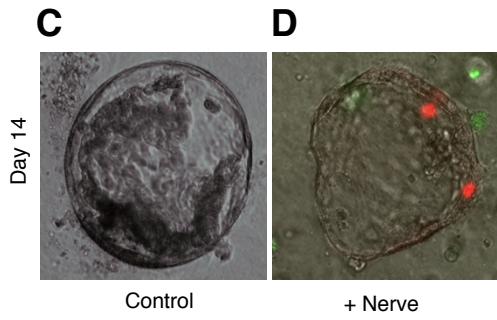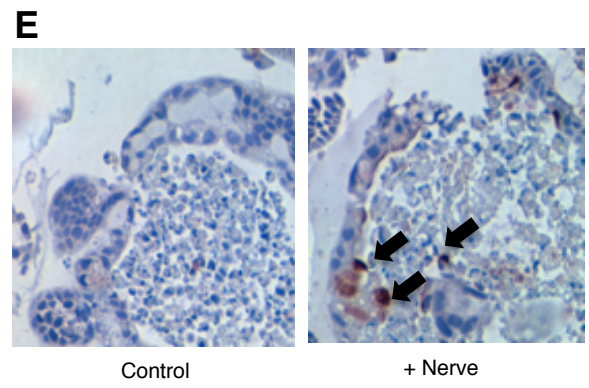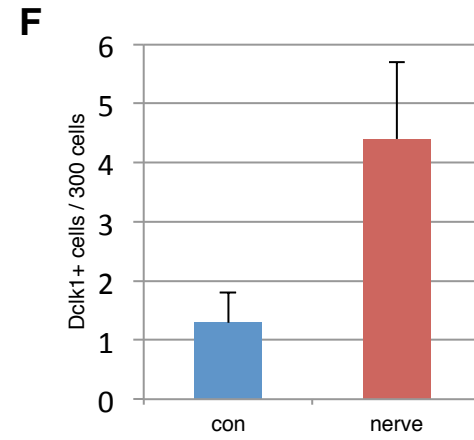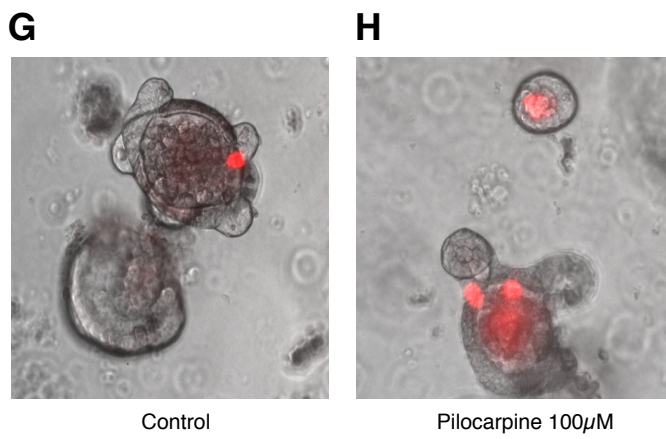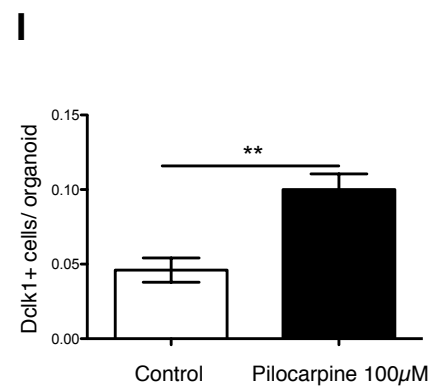



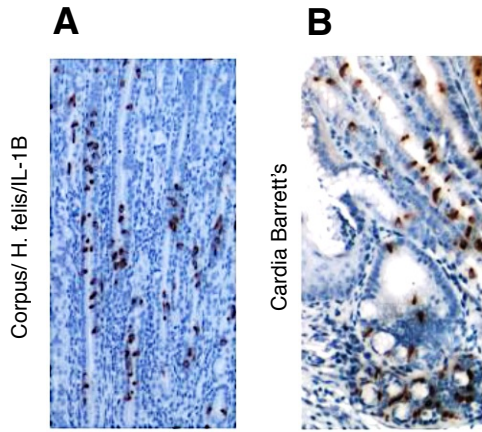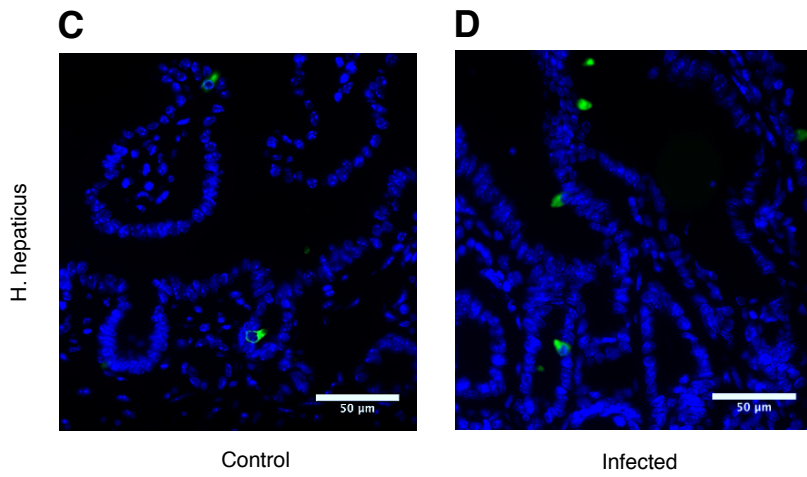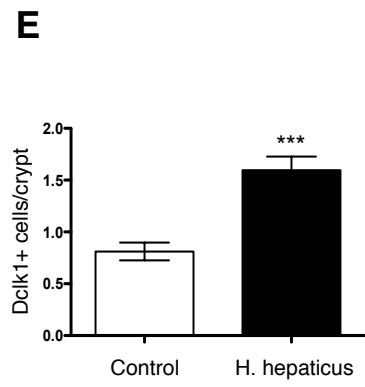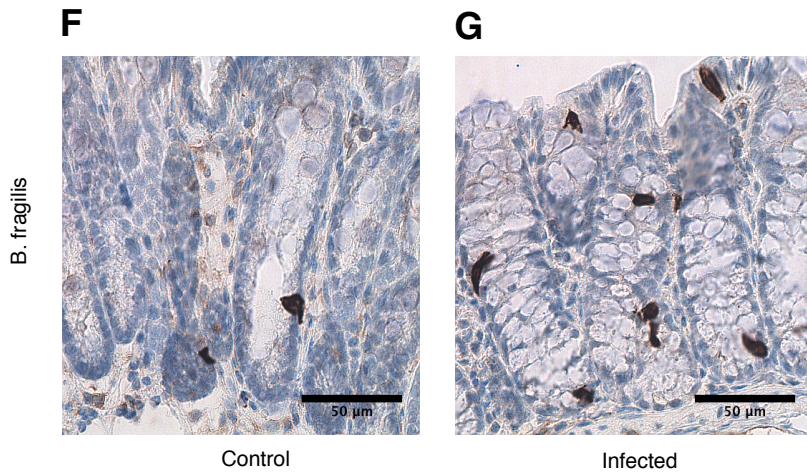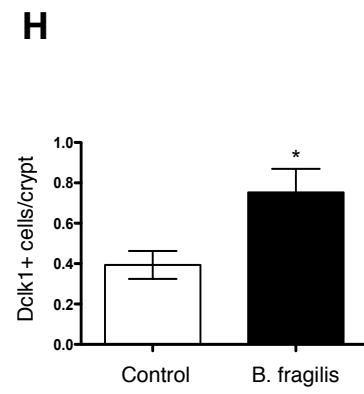

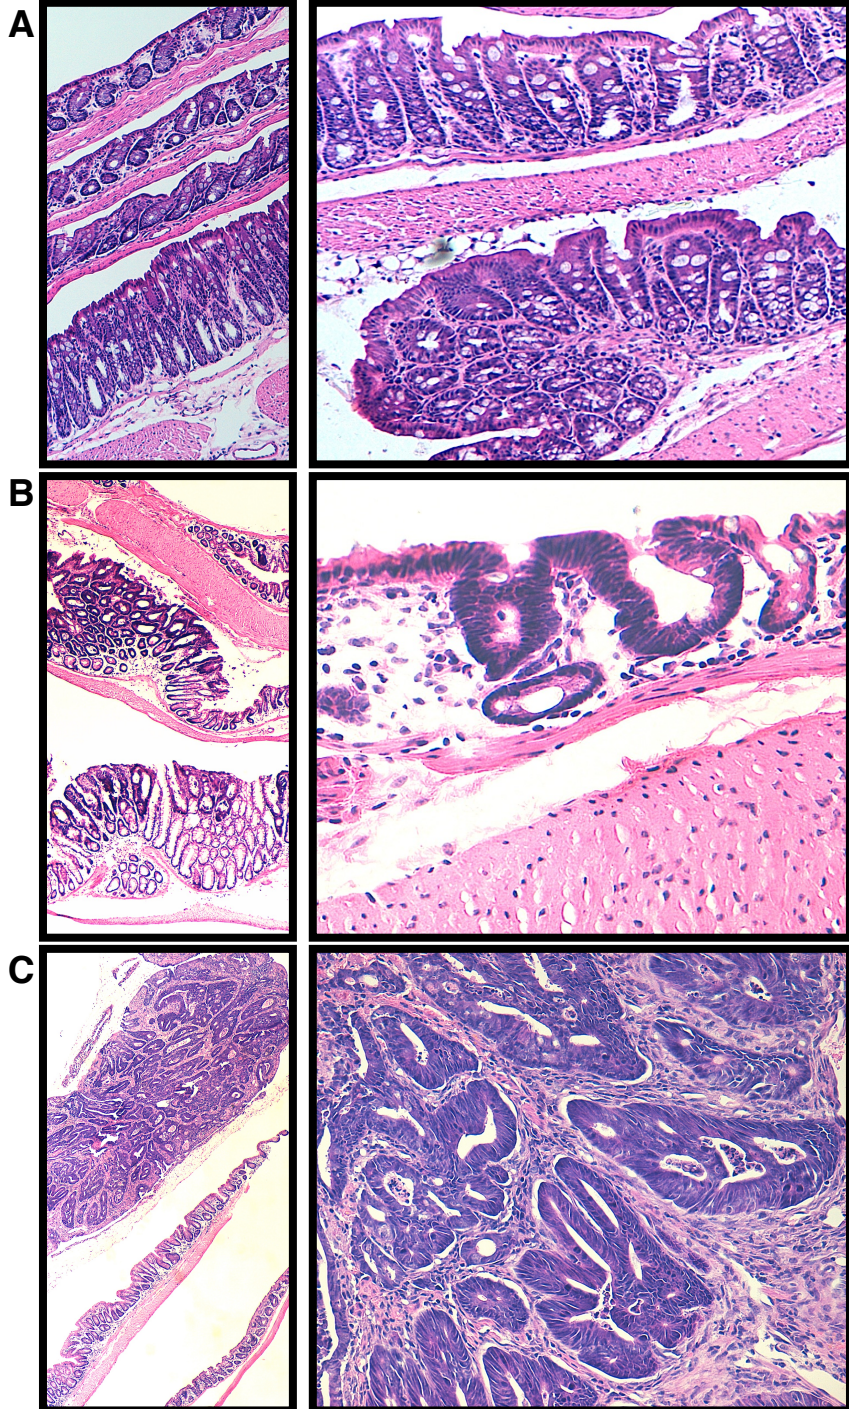

**Supplemental Table 1: Immunohistochemical analysis of recombined cells in Dclk1-Cre & CreERT mice**

| <b>Dclk1-Cre<sup>TM</sup></b> | <b>x</b> | <b>Recombined cells (100 crypts)</b> | <b>Dclk1</b> | <b>aGustducin</b> | <b>acTubulin</b> | <b>ChromA</b> |
|-------------------------------|----------|--------------------------------------|--------------|-------------------|------------------|---------------|
| Corpus                        |          | 42                                   | 95% ±2%      | 81% ±4%           | 98% ±1%          | 0% ±0%        |
| Antrum                        |          | 54                                   | 98% ±2%      | 89% ±2%           | 97% ±2%          | 5% ±0%        |
| Small Intestine               |          | 169                                  | 96% ±2%      | 79% ±5%           | 93% ±2%          | 3% ±1%        |
| Colon                         |          | 81                                   | 98% ±2%      | 94% ±2%           | 98% ±2%          | 0% ±0%        |
| <b>Dclk1-CreGFP</b>           |          | <b>GFP+ cells (100 crypts)</b>       | <b>Dclk1</b> | <b>aGustducin</b> | <b>acTubulin</b> | <b>ChromA</b> |
| Corpus                        |          | 56                                   | 85% ±4%      | 72% ±4%           | 82% ±5%          | 1% ±0%        |
| Antrum                        |          | 61                                   | 87% ±7%      | 74% ±2%           | 83% ±5%          | 2% ±1%        |
| Small Intestine               |          | 190                                  | 81% ±12%     | 59% ±4%           | 81% ±5%          | 1% ±0%        |
| Colon                         |          | 108                                  | 82% ±6%      | 61% ±7%           | 85% ±4%          | 1% ±0%        |

**Supplemental Table 2: Mouse strains used in the manuscript**

| <b>Full Name</b>               | <b>Abbreviation</b> | <b>Source</b> | <b>Consensus Name</b>                                 |
|--------------------------------|---------------------|---------------|-------------------------------------------------------|
| APC <sup>flox/flox</sup>       |                     | NCI           | B6: Apctm2Rak                                         |
| C57BL/6J                       | B6                  | Jackson labs  | C57BL/6J                                              |
| DCLK1-CreERT                   | Dclk1               | Generated     | DCLK1-BAC-CreERT                                      |
| DCLK1-CreGFP                   |                     | Generated     | DCLK1-BAC-CreGFP                                      |
| Dclk1 <sup>floxed/floxed</sup> |                     | Jackson labs  | Dclk1tm1.2Jgg/J                                       |
| Rosa26 DTA                     | R26DTA              | Jackson labs  | B6.129P2-Gt(ROSA)26Sortm1(DTA)Lky/J                   |
| Rosa26 LacZ                    | R26LacZ             | Jackson labs  | 129S-Gt(ROSA)26Sortm1Sor/J                            |
| Rosa26 mTomato/mGFP            | R26-TGFP            | Jackson labs  | B6.129(Cg)-Gt(ROSA)26Sortm4(ACTB-tdTomato,-EGFP)Luo/J |
| Rosa26 tdTomato                | R26tdTom            | Jackson labs  | B6;129S6-Gt(ROSA)26Sortm9(CAG-tdTomato)Hze/J          |
| Rosa26DTR                      | R26iDTR             | Jackson labs  | CBy.B6-Gt(ROSA)26Sortm1(HBEGF)Awai/J                  |
| UBC-GFP                        |                     | Jackson labs  | C57BL/6-Tg(UBC-GFP)30Scha/J                           |

**Supplemental Table 3: Antibodies used in the manuscript**

| <b>Name</b>                                           | <b>Company</b> | <b>Order Number</b> | <b>Dilution</b> |
|-------------------------------------------------------|----------------|---------------------|-----------------|
| Alexa Fluor 488 (F(ab') <sub>2</sub> Goat-anti-Rabbit | Invitrogen     | A11070              | 1:500           |
| Alexa Fluor 488 Conjugate anti-GFP                    | invitrogen     | A21311              | 1:50            |
| Alexa Fluor 546 Donkey-anti-mouse                     | Invitrogen     | A10036              | 1:500           |
| Alexa Fluor 546 Donkey-anti-Rabbit                    | Invitrogen     | A10040              | 1:500           |
| anti-acetylated-Tubulin                               | Sigma-Aldrich  | T7451               | 1:100           |
| anti-alpha-Gustducin                                  | Santa Cruz     | sc-395              | 1:200           |
| anti-BrdU                                             | AbCam          | ab6326              | 1:100           |
| anti-Cox2                                             | Pierce         | PA1-20955           | 1:250           |
| anti-Dcamk1                                           | Abgent         | AP7219b             | 1:200           |
| anti-Ki67                                             | abcam          | ab15580             | 1:500           |
| anti-Muc2                                             | Santa Cruz     | sc-15334            | 1:500           |
| anti-NGF                                              | Santa Cruz     | sc-549              | 1:100           |
| anti-Peripherin                                       | Millipore      | AB1530              | 1:200           |
| anti-β-catenin                                        | BD Bioscience  | 610157              | 1:100           |
| anti-β-Gal                                            | AbCam          | ab9361              | 1:1000          |
| anti-TFF3                                             | Santa Cruz     | sc-28927            | 1:500           |
